# Supplementary material for: Spectral Characterization and Crystal Structure of 1,2‐Bis‐(1H‐benzimidazol‐2‐yl)‐ethane Dihydrochloride
Source: Hindawi journal article supplement (doi:10.1155/2013/634986), 2012-08-07
Supplement: f1 [file 634986.f1.pdf]

data\_General  
\_audit\_creation\_date '2009-01-15'  
\_audit\_creation\_method 'by CrystalStructure v3.5.1'  
\_audit\_update\_record ?

#=====

=

# PROCESSING SUMMARY (IUCr Office Use Only)

\_journal\_date\_recd\_electronic ?  
\_journal\_date\_from\_coeditor ?  
\_journal\_date\_accepted ?  
\_journal\_coeditor\_code ?

#=====

=

# SUBMISSION DETAILS

\_publ\_contact\_author\_name 'Dr.M.Cgdem Sayil'  
\_publ\_contact\_author\_email 'sayil@istanbul.edu.tr'  
\_publ\_contact\_author\_fax 'ENTER FAX NUMBER'  
\_publ\_contact\_author\_phone 'ENTER PHONE NUMBER'  
\_publ\_contact\_letter  
;  
ENTER TEXT OF LETTER  
;  
\_publ\_requested\_journal 'ENTER JOURNAL NAME HERE'  
\_publ\_requested\_category 'CHOOSE FI FM FO CI CM CO or AD'  
\_publ\_requested\_coeditor\_name ?

#=====

=

# TITLE AND AUTHOR LIST

\_publ\_section\_title  
;  
ENTER SECTION TITLE  
;  
\_publ\_section\_title\_footnote

;  
ENTER FOOTNOTE TO TITLE OF PAPER

;  
loop\_  
\_publ\_author\_name  
\_publ\_author\_footnote  
\_publ\_author\_address  
'Tavman, Aydin' .  
; Istanbul University  
Faculty of Engineering  
Department of Chemistry  
34320 Avcilar-Istanbul  
Turkey

;  
'Sayil, Cigdem' .  
; Istanbul University  
Faculty of Engineering  
Department of Chemistry  
34320 Avcilar-Istanbul  
Turkey

;  
\_publ\_section\_synopsis

;  
ENTER SYNOPSIS

;

#=====

=

# TEXT

\_publ\_section\_abstract

;

ENTER ABSTRACT

;

\_publ\_section\_comment

;

ENTER TEXT

;

\_publ\_section\_references

;

ENTER OTHER REFERENCES

Rigaku/MSC and Rigaku Corporation. (2003).  
CrystalStructure.  
Single Crystal Structure Analysis Software. Version 3.5.1.  
Rigaku/MSC, 9009 New Trails Drive, The Woodlands, TX, USA 77381-5209.  
Rigaku, 3-9-12 Akishima, Tokyo 196-8666, Japan.

Watkin, D.J., Prout, C.K. Carruthers, J.R. & Betteridge, P.W. (1996)  
CRYSTALS Issue 10, Chemical Crystallography Laboratory, Oxford, UK.

Carruthers, J.R. and Watkin, D.J. (1979), Acta Cryst, A35, 698-699

```
;  
_publ_section_figure_captions  
;  
ENTER FIGURE CAPTIONS  
;  
_publ_section_exptl_prep  
;  
ENTER COMPOUND PREPARATION DETAILS  
;  
_publ_section_exptl_refinement  
;  
ENTER SPECIAL DETAILS OF THE REFINEMENT  
;
```

#=====

=

data\_\_AydinTavmanEBB2HClson

#=====

=

#### # CHEMICAL DATA

|                          |                   |
|--------------------------|-------------------|
| _chemical_formula_sum    | 'C16 H16 Cl2 N4 ' |
| _chemical_formula_moiety | 'C16 H16 Cl2 N4 ' |
| _chemical_formula_weight | 335.23            |
| _chemical_melting_point  | ?                 |

#=====

=

```

# CRYSTAL DATA
_symmetry_cell_setting      triclinic
_symmetry_space_group_name_H-M  'P -1'
_symmetry_space_group_name_Hall  '-P 1'
_symmetry_Int_Tables_number    2
loop_
_symmetry_equiv_pos_as_xyz
  'x,y,z'
  '-x,-y,-z'

```

#-----

```

_cell_length_a      7.13500
_cell_length_b      9.6299(1)
_cell_length_c      15.3340(7)
_cell_angle_alpha    80.67(2)
_cell_angle_beta     79.66(2)
_cell_angle_gamma    68.395(11)
_cell_volume         958.33(10)
_cell_formula_units_Z      2
_cell_measurement_reflns_used    4181
_cell_measurement_theta_min      2.7
_cell_measurement_theta_max      25.0
_cell_measurement_temperature    294

```

#-----

```

_exptl_crystal_description    'block'
_exptl_crystal_colour         'colorless'
_exptl_crystal_size_max       0.40
_exptl_crystal_size_mid       0.30
_exptl_crystal_size_min       0.10
_exptl_crystal_density_diffn   1.162
_exptl_crystal_density_meas    ?
_exptl_crystal_density_method  'not measured'
_exptl_crystal_F_000          348.00
_exptl_absorpt_coefficient_mu  0.339
_exptl_absorpt_correction_type multi-scan
_exptl_absorpt_process_details

```

;

Higashi, T. (1995). Program for Absorption Correction.

Rigaku Corporation, Tokyo, Japan.

;

\_exptl\_absorpt\_correction\_T\_min 0.885  
\_exptl\_absorpt\_correction\_T\_max 0.967

#=====

=

#### # EXPERIMENTAL DATA

\_diffn\_ambient\_temperature 293.1  
\_diffn\_radiation\_type 'Mo K\alpha'  
\_diffn\_radiation\_wavelength 0.7107  
\_diffn\_measurement\_device\_type 'Rigaku RAXIS-UNKNOWN'  
\_diffn\_measurement\_method \w  
\_diffn\_detector\_area\_resol\_mean 10.00  
\_diffn\_reflns\_number 47668  
\_diffn\_reflns\_av\_R\_equivalents 0.109  
\_diffn\_reflns\_theta\_max 25.07  
\_diffn\_measured\_fraction\_theta\_max 0.9953  
\_diffn\_reflns\_theta\_full 25.07  
\_diffn\_measured\_fraction\_theta\_full 0.9953  
\_diffn\_reflns\_limit\_h\_min -8  
\_diffn\_reflns\_limit\_h\_max 8  
\_diffn\_reflns\_limit\_k\_min -11  
\_diffn\_reflns\_limit\_k\_max 11  
\_diffn\_reflns\_limit\_l\_min -18  
\_diffn\_reflns\_limit\_l\_max 18

#=====

=

#### # REFINEMENT DATA

\_refine\_special\_details

;

Refinement using reflections with  $F^2 > 3.0 \sigma(F^2)$ .

The weighted R-factor (wR), goodness of fit (S) and R-factor (gt) are based on  $F$ , with  $F$  set to zero for negative  $F$ . The threshold expression of  $F^2 > 2.0 \sigma(F^2)$  is used only for calculating R-factor (gt).

;

\_reflns\_number\_total 3414

```

        _reflns_number_gt          2886
_reflns_threshold_expression      F^2>2.0\$(F^2)
        _refine_ls_structure_factor_coef    F
        _refine_ls_R_factor_gt          0.0840
        _refine_ls_wR_factor_ref        0.2190
_refine_ls_hydrogen_treatment    riding
        _refine_ls_number_reflns        2886
        _refine_ls_number_parameters    215
        _refine_ls_goodness_of_fit_ref  1.125
        _refine_ls_weighting_scheme     calc
        _refine_ls_weighting_details
;
Chebychev polynomial with 3 parameters (Carruthers & Watkin, 1979)
        15.8680  10.0543  9.9976
;
_refine_ls_shift/su_max          0.0000
_refine_diff_density_max         0.28
_refine_diff_density_min        -0.27
_refine_ls_extinction_method     none
_refine_ls_extinction_coef       ?

loop_
    _atom_type_symbol
    _atom_type_description
    _atom_type_scatter_dispersion_real
    _atom_type_scatter_dispersion_imag
    _atom_type_scatter_source
    'C' 'C' 0.003 0.002
;
International Tables for Crystallography
(1992, Vol. C, Tables 4.2.6.8 and 6.1.1.4)
;
'H' 'H' 0.000 0.000
;
International Tables for Crystallography
(1992, Vol. C, Table 6.1.1.4)
;
'N' 'N' 0.006 0.003
;
International Tables for Crystallography
(1992, Vol. C, Tables 4.2.6.8 and 6.1.1.4)
;

```

'Cl' 'Cl' 0.148 0.159

;

International Tables for Crystallography  
(1992, Vol. C, Tables 4.2.6.8 and 6.1.1.4)

;

#=====

=

# # ATOMIC COORDINATES AND THERMAL PARAMETERS

loop\_

\_atom\_site\_label

\_atom\_site\_type\_symbol

\_atom\_site\_fract\_x

\_atom\_site\_fract\_y

\_atom\_site\_fract\_z

\_atom\_site\_U\_iso\_or\_equiv

\_atom\_site\_adp\_type

\_atom\_site\_occupancy

\_atom\_site\_symmetry\_multiplicity

\_atom\_site\_calc\_flag

\_atom\_site\_refinement\_flags

\_atom\_site\_disorder\_assembly

\_atom\_site\_disorder\_group

|       |    |           |             |            |            |      |      |   |      |
|-------|----|-----------|-------------|------------|------------|------|------|---|------|
| Cl(1) | Cl | 0.6845(5) | -0.5289(3)  | 0.5846(2)  | 0.0385(9)  | Uani | 1.00 | 1 | d... |
| Cl(2) | Cl | 0.2679(7) | 0.0128(4)   | 0.9033(3)  | 0.0543(12) | Uani | 1.00 | 1 | d... |
| N(1)  | N  | 0.256(2)  | -0.3131(11) | 0.9341(6)  | 0.033(3)   | Uani | 1.00 | 1 | d... |
| N(3)  | N  | 0.327(1)  | -0.2184(11) | 0.5667(7)  | 0.028(2)   | Uani | 1.00 | 1 | d... |
| N(2)  | N  | 0.311(2)  | -0.5170(13) | 0.8815(7)  | 0.037(3)   | Uani | 1.00 | 1 | d... |
| N(4)  | N  | 0.124(2)  | 0.0002(11)  | 0.6130(6)  | 0.030(3)   | Uani | 1.00 | 1 | d... |
| C(16) | C  | 0.204(2)  | 0.0330(12)  | 0.5252(8)  | 0.031(3)   | Uani | 1.00 | 1 | d... |
| C(1)  | C  | 0.269(2)  | -0.5430(13) | 0.9737(9)  | 0.035(3)   | Uani | 1.00 | 1 | d... |
| C(7)  | C  | 0.301(2)  | -0.3789(13) | 0.8589(8)  | 0.030(3)   | Uani | 1.00 | 1 | d... |
| C(10) | C  | 0.212(2)  | -0.150(1)   | 0.6338(7)  | 0.030(3)   | Uani | 1.00 | 1 | d... |
| C(2)  | C  | 0.232(2)  | -0.4140(13) | 1.0070(7)  | 0.029(3)   | Uani | 1.00 | 1 | d... |
| C(11) | C  | 0.320(2)  | -0.1059(13) | 0.4975(8)  | 0.029(3)   | Uani | 1.00 | 1 | d... |
| C(14) | C  | 0.259(2)  | 0.1593(13)  | 0.3823(9)  | 0.032(3)   | Uani | 1.00 | 1 | d... |
| C(8)  | C  | 0.363(2)  | -0.3091(11) | 0.7672(6)  | 0.020(2)   | Uani | 1.00 | 1 | d... |
| C(12) | C  | 0.424(2)  | -0.1143(12) | 0.4063(8)  | 0.034(3)   | Uani | 1.00 | 1 | d... |
| C(3)  | C  | 0.187(2)  | -0.395(1)   | 1.1001(7)  | 0.029(3)   | Uani | 1.00 | 1 | d... |
| C(5)  | C  | 0.221(3)  | -0.655(2)   | 1.1178(11) | 0.053(5)   | Uani | 1.00 | 1 | d... |

|       |   |          |             |            |          |      |      |   |         |
|-------|---|----------|-------------|------------|----------|------|------|---|---------|
| C(13) | C | 0.384(2) | 0.022(2)    | 0.3531(9)  | 0.046(4) | Uani | 1.00 | 1 | d . . . |
| C(15) | C | 0.169(3) | 0.166(2)    | 0.4706(8)  | 0.045(4) | Uani | 1.00 | 1 | d . . . |
| C(9)  | C | 0.157(2) | -0.233(2)   | 0.7217(7)  | 0.038(3) | Uani | 1.00 | 1 | d . . . |
| C(6)  | C | 0.251(2) | -0.6721(13) | 1.0277(9)  | 0.041(4) | Uani | 1.00 | 1 | d . . . |
| C(4)  | C | 0.180(2) | -0.519(1)   | 1.1528(9)  | 0.034(3) | Uani | 1.00 | 1 | d . . . |
| H(1)  | H | 0.157(2) | -0.301(1)   | 1.1220(7)  | 0.034(4) | Uiso | 1.00 | 1 | d . . . |
| H(2)  | H | 0.162(2) | -0.517(1)   | 1.2155(9)  | 0.040(4) | Uiso | 1.00 | 1 | d . . . |
| H(3)  | H | 0.210(3) | -0.738(2)   | 1.1585(11) | 0.066(6) | Uiso | 1.00 | 1 | d . . . |
| H(4)  | H | 0.262(2) | -0.7606(13) | 1.0043(9)  | 0.047(4) | Uiso | 1.00 | 1 | d . . . |
| H(5)  | H | 0.250(2) | -0.2231(11) | 0.9372(6)  | 0.042(4) | Uiso | 1.00 | 1 | d . . . |
| H(6)  | H | 0.326(2) | -0.5799(13) | 0.8447(7)  | 0.050(4) | Uiso | 1.00 | 1 | d . . . |
| H(7)  | H | 0.422(2) | -0.2372(11) | 0.7720(6)  | 0.021(3) | Uiso | 1.00 | 1 | d . . . |
| H(8)  | H | 0.456(2) | -0.3841(11) | 0.7319(6)  | 0.021(3) | Uiso | 1.00 | 1 | d . . . |
| H(9)  | H | 0.062(2) | -0.161(2)   | 0.7588(7)  | 0.044(4) | Uiso | 1.00 | 1 | d . . . |
| H(10) | H | 0.102(2) | -0.306(2)   | 0.7155(7)  | 0.044(4) | Uiso | 1.00 | 1 | d . . . |
| H(11) | H | 0.395(1) | -0.3128(11) | 0.5656(7)  | 0.032(3) | Uiso | 1.00 | 1 | d . . . |
| H(12) | H | 0.055(2) | 0.0643(11)  | 0.6503(6)  | 0.034(3) | Uiso | 1.00 | 1 | d . . . |
| H(13) | H | 0.507(2) | -0.2074(12) | 0.3843(8)  | 0.036(4) | Uiso | 1.00 | 1 | d . . . |
| H(14) | H | 0.444(2) | 0.020(2)    | 0.2926(9)  | 0.047(4) | Uiso | 1.00 | 1 | d . . . |
| H(15) | H | 0.246(2) | 0.2494(13)  | 0.3439(9)  | 0.039(4) | Uiso | 1.00 | 1 | d . . . |
| H(16) | H | 0.076(3) | 0.257(2)    | 0.4919(8)  | 0.057(5) | Uiso | 1.00 | 1 | d . . . |

loop\_

\_atom\_site\_aniso\_label

\_atom\_site\_aniso\_U\_11

\_atom\_site\_aniso\_U\_22

\_atom\_site\_aniso\_U\_33

\_atom\_site\_aniso\_U\_12

\_atom\_site\_aniso\_U\_13

\_atom\_site\_aniso\_U\_23

|       |          |          |          |             |            |            |
|-------|----------|----------|----------|-------------|------------|------------|
| Cl(1) | 0.037(2) | 0.027(2) | 0.041(2) | -0.0055(12) | 0.0014(12) | 0.0034(12) |
| Cl(2) | 0.074(3) | 0.038(2) | 0.060(2) | -0.030(2)   | -0.020(2)  | 0.007(2)   |
| N(1)  | 0.066(7) | 0.025(5) | 0.013(4) | -0.024(5)   | 0.002(4)   | -0.004(4)  |
| N(3)  | 0.025(5) | 0.022(5) | 0.034(5) | -0.005(4)   | -0.001(4)  | -0.005(4)  |
| N(2)  | 0.033(5) | 0.061(7) | 0.030(5) | -0.025(5)   | 0.004(4)   | -0.027(5)  |
| N(4)  | 0.033(5) | 0.032(5) | 0.020(5) | -0.009(4)   | -0.005(4)  | 0.004(4)   |
| C(16) | 0.027(6) | 0.016(5) | 0.044(7) | -0.006(5)   | -0.013(5)  | 0.016(5)   |
| C(1)  | 0.021(5) | 0.030(6) | 0.038(7) | -0.004(5)   | 0.012(5)   | 0.006(5)   |
| C(7)  | 0.028(6) | 0.030(6) | 0.027(6) | -0.014(5)   | 0.010(4)   | 0.000(5)   |
| C(10) | 0.044(7) | 0.034(6) | 0.010(5) | -0.017(5)   | 0.001(4)   | 0.005(4)   |
| C(2)  | 0.037(6) | 0.031(6) | 0.022(6) | -0.008(5)   | -0.019(5)  | 0.002(5)   |



|       |           |          |          |           |           |           |
|-------|-----------|----------|----------|-----------|-----------|-----------|
| C(11) | 0.025(5)  | 0.027(6) | 0.047(7) | -0.018(5) | -0.017(5) | -0.000(5) |
| C(14) | 0.029(6)  | 0.020(6) | 0.047(7) | -0.015(5) | -0.005(5) | 0.012(5)  |
| C(8)  | 0.024(5)  | 0.017(5) | 0.011(5) | -0.005(4) | 0.004(4)  | 0.009(4)  |
| C(12) | 0.037(7)  | 0.016(5) | 0.038(7) | 0.001(5)  | 0.007(5)  | -0.009(5) |
| C(3)  | 0.023(5)  | 0.043(7) | 0.020(5) | -0.010(5) | -0.000(4) | -0.010(5) |
| C(5)  | 0.072(10) | 0.045(8) | 0.049(9) | -0.019(7) | -0.029(8) | -0.006(7) |
| C(13) | 0.052(8)  | 0.032(7) | 0.032(7) | 0.016(6)  | -0.013(6) | -0.009(5) |
| C(15) | 0.068(9)  | 0.057(9) | 0.017(6) | -0.035(8) | -0.011(6) | 0.014(6)  |
| C(9)  | 0.057(8)  | 0.046(7) | 0.008(5) | -0.018(6) | -0.000(5) | -0.001(5) |
| C(6)  | 0.053(8)  | 0.016(6) | 0.049(8) | -0.015(6) | -0.004(6) | 0.020(5)  |
| C(4)  | 0.023(6)  | 0.034(6) | 0.042(7) | -0.009(5) | -0.004(5) | 0.004(5)  |

#=====

=

|                                 |                               |
|---------------------------------|-------------------------------|
| _computing_data_collection      | 'PROCESS'                     |
| _computing_cell_refinement      | 'PROCESS'                     |
| _computing_data_reduction       | 'CrystalStructure'            |
| _computing_structure_solution   | 'SIR92'                       |
| _computing_structure_refinement | 'CRYSTALS'                    |
| _computing_publication_material | 'CrystalStructure Ver. 3.5.1' |
| _computing_molecular_graphics   | ?                             |

#=====

=

# # MOLECULAR GEOMETRY

\_geom\_special\_details

;

ENTER SPECIAL DETAILS OF THE MOLECULAR GEOMETRY

;

loop\_

\_geom\_bond\_atom\_site\_label\_1

\_geom\_bond\_atom\_site\_label\_2

\_geom\_bond\_distance

\_geom\_bond\_publ\_flag

\_geom\_bond\_site\_symmetry\_1

\_geom\_bond\_site\_symmetry\_2

N(1) C(7) 1.34(2) yes ..

N(1) C(2) 1.39(1) yes ..

|       |       |          |     |    |
|-------|-------|----------|-----|----|
| N(1)  | H(5)  | 0.86(2)  | no  | .. |
| N(3)  | C(10) | 1.30(1)  | yes | .. |
| N(3)  | C(11) | 1.38(1)  | yes | .. |
| N(3)  | H(11) | 0.86(1)  | no  | .. |
| N(2)  | C(1)  | 1.39(2)  | yes | .. |
| N(2)  | C(7)  | 1.30(2)  | yes | .. |
| N(2)  | H(6)  | 0.86(2)  | no  | .. |
| N(4)  | C(16) | 1.40(1)  | yes | .. |
| N(4)  | C(10) | 1.35(1)  | yes | .. |
| N(4)  | H(12) | 0.86(1)  | no  | .. |
| C(16) | C(11) | 1.38(2)  | yes | .. |
| C(16) | C(15) | 1.38(2)  | yes | .. |
| C(1)  | C(2)  | 1.34(2)  | yes | .. |
| C(1)  | C(6)  | 1.41(2)  | yes | .. |
| C(7)  | C(8)  | 1.52(1)  | yes | .. |
| C(10) | C(9)  | 1.52(2)  | yes | .. |
| C(2)  | C(3)  | 1.43(2)  | yes | .. |
| C(11) | C(12) | 1.46(2)  | yes | .. |
| C(14) | C(13) | 1.39(2)  | yes | .. |
| C(14) | C(15) | 1.39(2)  | yes | .. |
| C(14) | H(15) | 0.95(2)  | no  | .. |
| C(8)  | C(9)  | 1.61(2)  | yes | .. |
| C(8)  | H(7)  | 0.95(2)  | no  | .. |
| C(8)  | H(8)  | 0.95(1)  | no  | .. |
| C(12) | C(13) | 1.39(2)  | yes | .. |
| C(12) | H(13) | 0.95(2)  | no  | .. |
| C(3)  | C(4)  | 1.34(2)  | yes | .. |
| C(3)  | H(1)  | 0.95(2)  | no  | .. |
| C(5)  | C(6)  | 1.39(2)  | yes | .. |
| C(5)  | C(4)  | 1.40(2)  | yes | .. |
| C(5)  | H(3)  | 0.95(2)  | no  | .. |
| C(13) | H(14) | 0.95(2)  | no  | .. |
| C(15) | H(16) | 0.95(2)  | no  | .. |
| C(9)  | H(9)  | 0.95(2)  | no  | .. |
| C(9)  | H(10) | 0.95(3)  | no  | .. |
| C(6)  | H(4)  | 0.95(2)  | no  | .. |
| C(4)  | H(2)  | 0.95(2)  | no  | .. |
| H(11) | Cl(1) | 2.354(8) | no  | .. |

loop\_

\_geom\_angle\_atom\_site\_label\_1

\_geom\_angle\_atom\_site\_label\_2

\_geom\_angle\_atom\_site\_label\_3

\_geom\_angle

\_geom\_angle\_publ\_flag

\_geom\_angle\_site\_symmetry\_1

\_geom\_angle\_site\_symmetry\_2

\_geom\_angle\_site\_symmetry\_3

|       |       |       |           |     |     |
|-------|-------|-------|-----------|-----|-----|
| C(7)  | N(1)  | C(2)  | 110.1(10) | yes | ... |
| C(7)  | N(1)  | H(5)  | 125(1)    | no  | ... |
| C(2)  | N(1)  | H(5)  | 124(1)    | no  | ... |
| C(10) | N(3)  | C(11) | 104.9(9)  | yes | ... |
| C(10) | N(3)  | H(11) | 127(1)    | no  | ... |
| C(11) | N(3)  | H(11) | 127(1)    | no  | ... |
| C(1)  | N(2)  | C(7)  | 110(1)    | yes | ... |
| C(1)  | N(2)  | H(6)  | 124(1)    | no  | ... |
| C(7)  | N(2)  | H(6)  | 124(1)    | no  | ... |
| C(16) | N(4)  | C(10) | 106.7(8)  | yes | ... |
| C(16) | N(4)  | H(12) | 126(1)    | no  | ... |
| C(10) | N(4)  | H(12) | 125(1)    | no  | ... |
| C(11) | C(16) | C(15) | 123(1)    | yes | ... |
| C(11) | C(16) | N(4)  | 104(1)    | yes | ... |
| C(15) | C(16) | N(4)  | 131(1)    | yes | ... |
| C(2)  | C(1)  | C(6)  | 122(1)    | yes | ... |
| C(2)  | C(1)  | N(2)  | 107(1)    | yes | ... |
| C(6)  | C(1)  | N(2)  | 130(1)    | yes | ... |
| C(8)  | C(7)  | N(1)  | 124(1)    | yes | ... |
| C(8)  | C(7)  | N(2)  | 127(1)    | yes | ... |
| N(1)  | C(7)  | N(2)  | 107(1)    | yes | ... |
| C(9)  | C(10) | N(3)  | 122(1)    | yes | ... |
| C(9)  | C(10) | N(4)  | 123.6(9)  | yes | ... |
| N(3)  | C(10) | N(4)  | 113.2(9)  | yes | ... |
| C(3)  | C(2)  | N(1)  | 129(1)    | yes | ... |
| C(3)  | C(2)  | C(1)  | 124(1)    | yes | ... |
| N(1)  | C(2)  | C(1)  | 105(1)    | yes | ... |
| C(12) | C(11) | N(3)  | 130(1)    | yes | ... |
| C(12) | C(11) | C(16) | 118(1)    | yes | ... |
| N(3)  | C(11) | C(16) | 110(1)    | yes | ... |
| C(13) | C(14) | C(15) | 119(1)    | yes | ... |
| C(13) | C(14) | H(15) | 120(1)    | no  | ... |
| C(15) | C(14) | H(15) | 119(1)    | no  | ... |
| C(9)  | C(8)  | H(7)  | 111(1)    | no  | ... |
| C(9)  | C(8)  | H(8)  | 108(1)    | no  | ... |
| C(9)  | C(8)  | C(7)  | 105.6(9)  | yes | ... |

|       |       |       |        |     |     |
|-------|-------|-------|--------|-----|-----|
| H(7)  | C(8)  | H(8)  | 109(1) | no  | ... |
| H(7)  | C(8)  | C(7)  | 110(1) | no  | ... |
| H(8)  | C(8)  | C(7)  | 110(1) | no  | ... |
| C(13) | C(12) | H(13) | 122(1) | no  | ... |
| C(13) | C(12) | C(11) | 115(1) | yes | ... |
| H(13) | C(12) | C(11) | 121(1) | no  | ... |
| C(4)  | C(3)  | H(1)  | 123(1) | no  | ... |
| C(4)  | C(3)  | C(2)  | 113(1) | yes | ... |
| H(1)  | C(3)  | C(2)  | 122(1) | no  | ... |
| C(6)  | C(5)  | C(4)  | 124(1) | yes | ... |
| C(6)  | C(5)  | H(3)  | 117(2) | no  | ... |
| C(4)  | C(5)  | H(3)  | 117(1) | no  | ... |
| H(14) | C(13) | C(14) | 117(1) | no  | ... |
| H(14) | C(13) | C(12) | 117(1) | no  | ... |
| C(14) | C(13) | C(12) | 124(1) | yes | ... |
| H(16) | C(15) | C(16) | 119(1) | no  | ... |
| H(16) | C(15) | C(14) | 121(1) | no  | ... |
| C(16) | C(15) | C(14) | 117(1) | yes | ... |
| H(9)  | C(9)  | H(10) | 109(1) | no  | ... |
| H(9)  | C(9)  | C(10) | 108(1) | no  | ... |
| H(9)  | C(9)  | C(8)  | 107(1) | no  | ... |
| H(10) | C(9)  | C(10) | 113(1) | no  | ... |
| H(10) | C(9)  | C(8)  | 110(1) | no  | ... |
| C(10) | C(9)  | C(8)  | 106(1) | yes | ... |
| H(4)  | C(6)  | C(1)  | 123(1) | no  | ... |
| H(4)  | C(6)  | C(5)  | 124(1) | no  | ... |
| C(1)  | C(6)  | C(5)  | 112(1) | yes | ... |
| H(2)  | C(4)  | C(3)  | 118(1) | no  | ... |
| H(2)  | C(4)  | C(5)  | 119(1) | no  | ... |
| C(3)  | C(4)  | C(5)  | 121(1) | yes | ... |
| Cl(1) | H(11) | N(3)  | 153(1) | no  | ... |

loop\_

\_geom\_torsion\_atom\_site\_label\_1  
 \_geom\_torsion\_atom\_site\_label\_2  
 \_geom\_torsion\_atom\_site\_label\_3  
 \_geom\_torsion\_atom\_site\_label\_4  
 \_geom\_torsion  
 \_geom\_torsion\_publ\_flag  
 \_geom\_torsion\_site\_symmetry\_1  
 \_geom\_torsion\_site\_symmetry\_2  
 \_geom\_torsion\_site\_symmetry\_3

\_geom\_torsion\_site\_symmetry\_4

|       |       |       |       |            |     |      |
|-------|-------|-------|-------|------------|-----|------|
| C(2)  | N(1)  | C(7)  | N(2)  | -1(1)      | yes | .... |
| C(2)  | N(1)  | C(7)  | C(8)  | -172(1)    | yes | .... |
| H(5)  | N(1)  | C(7)  | N(2)  | 175(1)     | no  | .... |
| H(5)  | N(1)  | C(7)  | C(8)  | 4(2)       | no  | .... |
| C(7)  | N(1)  | C(2)  | C(1)  | 1(1)       | yes | .... |
| C(7)  | N(1)  | C(2)  | C(3)  | 178(1)     | yes | .... |
| H(5)  | N(1)  | C(2)  | C(1)  | -175(1)    | no  | .... |
| H(5)  | N(1)  | C(2)  | C(3)  | 1(2)       | no  | .... |
| C(11) | N(3)  | C(10) | N(4)  | 2(1)       | yes | .... |
| C(11) | N(3)  | C(10) | C(9)  | 173(1)     | yes | .... |
| H(11) | N(3)  | C(10) | N(4)  | -179.3(14) | no  | .... |
| H(11) | N(3)  | C(10) | C(9)  | -8(2)      | no  | .... |
| C(10) | N(3)  | C(11) | C(16) | 1(1)       | yes | .... |
| C(10) | N(3)  | C(11) | C(12) | 177(1)     | yes | .... |
| H(11) | N(3)  | C(11) | C(16) | -176(1)    | no  | .... |
| H(11) | N(3)  | C(11) | C(12) | 0(2)       | no  | .... |
| C(10) | N(3)  | H(11) | Cl(1) | -86(2)     | no  | .... |
| C(11) | N(3)  | H(11) | Cl(1) | 91(2)      | no  | .... |
| C(7)  | N(2)  | C(1)  | C(2)  | 0(1)       | yes | .... |
| C(7)  | N(2)  | C(1)  | C(6)  | 175(1)     | yes | .... |
| H(6)  | N(2)  | C(1)  | C(2)  | -172(1)    | no  | .... |
| H(6)  | N(2)  | C(1)  | C(6)  | 3(2)       | no  | .... |
| C(1)  | N(2)  | C(7)  | N(1)  | 0(1)       | yes | .... |
| C(1)  | N(2)  | C(7)  | C(8)  | 171(1)     | yes | .... |
| H(6)  | N(2)  | C(7)  | N(1)  | 173(1)     | no  | .... |
| H(6)  | N(2)  | C(7)  | C(8)  | -16(2)     | no  | .... |
| C(10) | N(4)  | C(16) | C(11) | 5(1)       | yes | .... |
| C(10) | N(4)  | C(16) | C(15) | 179.9(18)  | yes | .... |
| H(12) | N(4)  | C(16) | C(11) | 172(1)     | no  | .... |
| H(12) | N(4)  | C(16) | C(15) | -12(2)     | no  | .... |
| C(16) | N(4)  | C(10) | N(3)  | -5(1)      | yes | .... |
| C(16) | N(4)  | C(10) | C(9)  | -175(1)    | yes | .... |
| H(12) | N(4)  | C(10) | N(3)  | -172(1)    | no  | .... |
| H(12) | N(4)  | C(10) | C(9)  | 16(2)      | no  | .... |
| N(4)  | C(16) | C(11) | N(3)  | -4(1)      | yes | .... |
| N(4)  | C(16) | C(11) | C(12) | 178(1)     | yes | .... |
| C(15) | C(16) | C(11) | N(3)  | -179.7(16) | yes | .... |
| C(15) | C(16) | C(11) | C(12) | 3(2)       | yes | .... |
| N(4)  | C(16) | C(15) | C(14) | -173(1)    | yes | .... |
| N(4)  | C(16) | C(15) | H(16) | 0(3)       | no  | .... |
| C(11) | C(16) | C(15) | C(14) | 0(2)       | yes | .... |

|       |       |       |       |           |     |      |
|-------|-------|-------|-------|-----------|-----|------|
| C(11) | C(16) | C(15) | H(16) | 173(2)    | no  | .... |
| N(2)  | C(1)  | C(2)  | N(1)  | -1(1)     | yes | .... |
| N(2)  | C(1)  | C(2)  | C(3)  | -178(1)   | yes | .... |
| C(6)  | C(1)  | C(2)  | N(1)  | -177(1)   | yes | .... |
| C(6)  | C(1)  | C(2)  | C(3)  | 5(2)      | yes | .... |
| N(2)  | C(1)  | C(6)  | C(5)  | 176(1)    | yes | .... |
| N(2)  | C(1)  | C(6)  | H(4)  | -2(2)     | no  | .... |
| C(2)  | C(1)  | C(6)  | C(5)  | -9(2)     | yes | .... |
| C(2)  | C(1)  | C(6)  | H(4)  | 172(1)    | no  | .... |
| N(1)  | C(7)  | C(8)  | C(9)  | -95(1)    | yes | .... |
| N(1)  | C(7)  | C(8)  | H(7)  | 25(1)     | no  | .... |
| N(1)  | C(7)  | C(8)  | H(8)  | 147(1)    | no  | .... |
| N(2)  | C(7)  | C(8)  | C(9)  | 95(1)     | yes | .... |
| N(2)  | C(7)  | C(8)  | H(7)  | -143(1)   | no  | .... |
| N(2)  | C(7)  | C(8)  | H(8)  | -21(2)    | no  | .... |
| N(3)  | C(10) | C(9)  | C(8)  | 69(1)     | yes | .... |
| N(3)  | C(10) | C(9)  | H(9)  | -174(1)   | no  | .... |
| N(3)  | C(10) | C(9)  | H(10) | -52(2)    | no  | .... |
| N(4)  | C(10) | C(9)  | C(8)  | -120(1)   | yes | .... |
| N(4)  | C(10) | C(9)  | H(9)  | -4(2)     | no  | .... |
| N(4)  | C(10) | C(9)  | H(10) | 117(1)    | no  | .... |
| N(1)  | C(2)  | C(3)  | C(4)  | -178(1)   | yes | .... |
| N(1)  | C(2)  | C(3)  | H(1)  | 5(2)      | no  | .... |
| C(1)  | C(2)  | C(3)  | C(4)  | -2(1)     | yes | .... |
| C(1)  | C(2)  | C(3)  | H(1)  | -178(1)   | no  | .... |
| N(3)  | C(11) | C(12) | C(13) | 179.6(14) | yes | .... |
| N(3)  | C(11) | C(12) | H(13) | 3(2)      | no  | .... |
| C(16) | C(11) | C(12) | C(13) | -4(2)     | yes | .... |
| C(16) | C(11) | C(12) | H(13) | 179.3(18) | no  | .... |
| C(15) | C(14) | C(13) | C(12) | 1(2)      | yes | .... |
| C(15) | C(14) | C(13) | H(14) | -180(2)   | no  | .... |
| H(15) | C(14) | C(13) | C(12) | 174(1)    | no  | .... |
| H(15) | C(14) | C(13) | H(14) | -5(3)     | no  | .... |
| C(13) | C(14) | C(15) | C(16) | -2(2)     | yes | .... |
| C(13) | C(14) | C(15) | H(16) | -175(2)   | no  | .... |
| H(15) | C(14) | C(15) | C(16) | -175(1)   | no  | .... |
| H(15) | C(14) | C(15) | H(16) | 10(3)     | no  | .... |
| C(7)  | C(8)  | C(9)  | C(10) | 174(1)    | yes | .... |
| C(7)  | C(8)  | C(9)  | H(9)  | 58(1)     | no  | .... |
| C(7)  | C(8)  | C(9)  | H(10) | -61(1)    | no  | .... |
| H(7)  | C(8)  | C(9)  | C(10) | 54(1)     | no  | .... |
| H(7)  | C(8)  | C(9)  | H(9)  | -62(1)    | no  | .... |

|       |       |       |       |         |     |      |
|-------|-------|-------|-------|---------|-----|------|
| H(7)  | C(8)  | C(9)  | H(10) | 178(1)  | no  | .... |
| H(8)  | C(8)  | C(9)  | C(10) | -66(1)  | no  | .... |
| H(8)  | C(8)  | C(9)  | H(9)  | 177(1)  | no  | .... |
| H(8)  | C(8)  | C(9)  | H(10) | 57(1)   | no  | .... |
| C(11) | C(12) | C(13) | C(14) | 1(2)    | yes | .... |
| C(11) | C(12) | C(13) | H(14) | -177(2) | no  | .... |
| H(13) | C(12) | C(13) | C(14) | 178(1)  | no  | .... |
| H(13) | C(12) | C(13) | H(14) | -1(3)   | no  | .... |
| C(2)  | C(3)  | C(4)  | C(5)  | 2(1)    | yes | .... |
| C(2)  | C(3)  | C(4)  | H(2)  | 175(1)  | no  | .... |
| H(1)  | C(3)  | C(4)  | C(5)  | 178(1)  | no  | .... |
| H(1)  | C(3)  | C(4)  | H(2)  | -8(2)   | no  | .... |
| C(4)  | C(5)  | C(6)  | C(1)  | 9(2)    | yes | .... |
| C(4)  | C(5)  | C(6)  | H(4)  | -171(2) | no  | .... |
| H(3)  | C(5)  | C(6)  | C(1)  | -178(1) | no  | .... |
| H(3)  | C(5)  | C(6)  | H(4)  | 0(3)    | no  | .... |
| C(6)  | C(5)  | C(4)  | C(3)  | -7(2)   | yes | .... |
| C(6)  | C(5)  | C(4)  | H(2)  | -180(2) | no  | .... |
| H(3)  | C(5)  | C(4)  | C(3)  | -178(2) | no  | .... |
| H(3)  | C(5)  | C(4)  | H(2)  | 8(3)    | no  | .... |

loop\_

\_geom\_contact\_atom\_site\_label\_1

\_geom\_contact\_atom\_site\_label\_2

\_geom\_contact\_distance

\_geom\_contact\_publ\_flag

\_geom\_contact\_site\_symmetry\_1

\_geom\_contact\_site\_symmetry\_2

|       |       |          |     |        |
|-------|-------|----------|-----|--------|
| Cl(1) | N(3)  | 3.146(8) | yes | .55501 |
| Cl(1) | H(8)  | 2.781(9) | no  | .55501 |
| Cl(1) | H(11) | 2.354(8) | no  | .55501 |
| Cl(1) | H(16) | 3.06(1)  | no  | .64501 |
| Cl(2) | N(1)  | 3.13(1)  | yes | .55501 |
| Cl(2) | H(4)  | 2.86(2)  | no  | .56501 |
| Cl(2) | H(5)  | 2.29(1)  | no  | .55501 |
| Cl(2) | H(7)  | 3.15(1)  | no  | .55501 |
| N(1)  | Cl(2) | 3.13(1)  | yes | .55501 |
| N(1)  | N(2)  | 2.12(2)  | yes | .55501 |
| N(1)  | C(1)  | 2.17(2)  | yes | .55501 |
| N(1)  | C(8)  | 2.53(1)  | yes | .55501 |
| N(1)  | C(3)  | 2.55(1)  | yes | .55501 |
| N(1)  | C(9)  | 3.36(1)  | yes | .55501 |

|       |       |          |     |        |
|-------|-------|----------|-----|--------|
| N(1)  | C(6)  | 3.53(2)  | yes | .55501 |
| N(1)  | H(1)  | 2.85(1)  | no  | .55501 |
| N(1)  | H(6)  | 2.95(2)  | no  | .55501 |
| N(1)  | H(7)  | 2.67(1)  | no  | .55501 |
| N(1)  | H(8)  | 3.24(1)  | no  | .55501 |
| N(1)  | H(9)  | 3.14(2)  | no  | .55501 |
| N(3)  | Cl(1) | 3.146(8) | yes | .55501 |
| N(3)  | N(4)  | 2.21(1)  | yes | .55501 |
| N(3)  | C(16) | 2.27(1)  | yes | .55501 |
| N(3)  | C(8)  | 3.09(1)  | yes | .55501 |
| N(3)  | C(12) | 2.58(2)  | yes | .55501 |
| N(3)  | C(15) | 3.59(2)  | yes | .55501 |
| N(3)  | C(9)  | 2.47(1)  | yes | .55501 |
| N(3)  | H(7)  | 3.30(1)  | no  | .55501 |
| N(3)  | H(8)  | 2.87(1)  | no  | .55501 |
| N(3)  | H(9)  | 3.21(1)  | no  | .55501 |
| N(3)  | H(10) | 2.75(2)  | no  | .55501 |
| N(3)  | H(12) | 3.03(1)  | no  | .55501 |
| N(3)  | H(13) | 2.86(2)  | no  | .55501 |
| N(2)  | N(1)  | 2.12(2)  | yes | .55501 |
| N(2)  | C(2)  | 2.20(2)  | yes | .55501 |
| N(2)  | C(8)  | 2.53(2)  | yes | .55501 |
| N(2)  | C(3)  | 3.58(2)  | yes | .55501 |
| N(2)  | C(9)  | 3.36(2)  | yes | .55501 |
| N(2)  | C(6)  | 2.54(2)  | yes | .55501 |
| N(2)  | H(4)  | 2.85(2)  | no  | .55501 |
| N(2)  | H(5)  | 2.94(2)  | no  | .55501 |
| N(2)  | H(7)  | 3.21(2)  | no  | .55501 |
| N(2)  | H(8)  | 2.67(1)  | no  | .55501 |
| N(2)  | H(10) | 3.21(2)  | no  | .55501 |
| N(4)  | N(3)  | 2.21(1)  | yes | .55501 |
| N(4)  | C(11) | 2.19(1)  | yes | .55501 |
| N(4)  | C(8)  | 3.58(1)  | yes | .55501 |
| N(4)  | C(12) | 3.58(1)  | yes | .55501 |
| N(4)  | C(15) | 2.53(2)  | yes | .55501 |
| N(4)  | C(9)  | 2.53(2)  | yes | .55501 |
| N(4)  | H(7)  | 3.49(1)  | no  | .55501 |
| N(4)  | H(9)  | 2.58(1)  | no  | .55501 |
| N(4)  | H(10) | 3.15(2)  | no  | .55501 |
| N(4)  | H(11) | 3.04(1)  | no  | .55501 |
| N(4)  | H(16) | 2.79(2)  | no  | .55501 |
| C(16) | N(3)  | 2.27(1)  | yes | .55501 |



|       |       |         |     |        |
|-------|-------|---------|-----|--------|
| C(16) | C(10) | 2.21(2) | yes | .55501 |
| C(16) | C(14) | 2.37(2) | yes | .55501 |
| C(16) | C(12) | 2.45(2) | yes | .55501 |
| C(16) | C(13) | 2.72(2) | yes | .55501 |
| C(16) | H(11) | 3.10(1) | no  | .55501 |
| C(16) | H(12) | 2.03(1) | no  | .55501 |
| C(16) | H(13) | 3.31(2) | no  | .55501 |
| C(16) | H(15) | 3.23(2) | no  | .55501 |
| C(16) | H(16) | 2.03(2) | no  | .55501 |
| C(1)  | N(1)  | 2.17(2) | yes | .55501 |
| C(1)  | C(7)  | 2.21(2) | yes | .55501 |
| C(1)  | C(3)  | 2.45(2) | yes | .55501 |
| C(1)  | C(5)  | 2.32(2) | yes | .55501 |
| C(1)  | C(4)  | 2.73(2) | yes | .55501 |
| C(1)  | H(1)  | 3.31(2) | no  | .55501 |
| C(1)  | H(3)  | 3.19(2) | no  | .55501 |
| C(1)  | H(4)  | 2.09(2) | no  | .55501 |
| C(1)  | H(5)  | 3.00(2) | no  | .55501 |
| C(1)  | H(6)  | 2.01(2) | no  | .55501 |
| C(7)  | C(1)  | 2.21(2) | yes | .55501 |
| C(7)  | C(2)  | 2.23(2) | yes | .55501 |
| C(7)  | C(9)  | 2.49(2) | yes | .55501 |
| C(7)  | C(6)  | 3.58(2) | yes | .55501 |
| C(7)  | H(5)  | 1.96(2) | no  | .55501 |
| C(7)  | H(6)  | 1.92(2) | no  | .55501 |
| C(7)  | H(7)  | 2.06(2) | no  | .55501 |
| C(7)  | H(8)  | 2.06(1) | no  | .55501 |
| C(7)  | H(9)  | 2.63(2) | no  | .55501 |
| C(7)  | H(10) | 2.69(2) | no  | .55501 |
| C(10) | C(16) | 2.21(2) | yes | .55501 |
| C(10) | C(11) | 2.13(2) | yes | .55501 |
| C(10) | C(8)  | 2.50(1) | yes | .55501 |
| C(10) | C(12) | 3.56(2) | yes | .55501 |
| C(10) | C(15) | 3.57(2) | yes | .55501 |
| C(10) | H(7)  | 2.66(2) | no  | .55501 |
| C(10) | H(8)  | 2.71(1) | no  | .55501 |
| C(10) | H(9)  | 2.03(1) | no  | .55501 |
| C(10) | H(10) | 2.09(2) | no  | .55501 |
| C(10) | H(11) | 1.95(1) | no  | .55501 |
| C(10) | H(12) | 1.98(1) | no  | .55501 |
| C(2)  | N(2)  | 2.20(2) | yes | .55501 |
| C(2)  | C(7)  | 2.23(2) | yes | .55501 |

|       |       |         |     |        |
|-------|-------|---------|-----|--------|
| C(2)  | C(5)  | 2.66(2) | yes | .55501 |
| C(2)  | C(6)  | 2.41(2) | yes | .55501 |
| C(2)  | C(4)  | 2.33(2) | yes | .55501 |
| C(2)  | H(1)  | 2.11(2) | no  | .55501 |
| C(2)  | H(2)  | 3.20(2) | no  | .55501 |
| C(2)  | H(4)  | 3.27(2) | no  | .55501 |
| C(2)  | H(5)  | 2.01(2) | no  | .55501 |
| C(2)  | H(6)  | 3.02(2) | no  | .55501 |
| C(11) | N(4)  | 2.19(1) | yes | .55501 |
| C(11) | C(10) | 2.13(2) | yes | .55501 |
| C(11) | C(14) | 2.80(2) | yes | .55501 |
| C(11) | C(13) | 2.40(2) | yes | .55501 |
| C(11) | C(15) | 2.43(2) | yes | .55501 |
| C(11) | C(9)  | 3.59(2) | yes | .55501 |
| C(11) | H(11) | 2.02(1) | no  | .55501 |
| C(11) | H(12) | 3.02(1) | no  | .55501 |
| C(11) | H(13) | 2.12(2) | no  | .55501 |
| C(11) | H(14) | 3.27(2) | no  | .55501 |
| C(11) | H(16) | 3.28(2) | no  | .55501 |
| C(14) | C(16) | 2.37(2) | yes | .55501 |
| C(14) | C(11) | 2.80(2) | yes | .55501 |
| C(14) | C(12) | 2.45(2) | yes | .55501 |
| C(14) | H(3)  | 3.46(2) | no  | .56401 |
| C(14) | H(13) | 3.31(2) | no  | .55501 |
| C(14) | H(14) | 2.02(2) | no  | .55501 |
| C(14) | H(16) | 2.06(2) | no  | .55501 |
| C(8)  | N(1)  | 2.53(1) | yes | .55501 |
| C(8)  | N(3)  | 3.09(1) | yes | .55501 |
| C(8)  | N(2)  | 2.53(2) | yes | .55501 |
| C(8)  | N(4)  | 3.58(1) | yes | .55501 |
| C(8)  | C(10) | 2.50(1) | yes | .55501 |
| C(8)  | C(9)  | 1.61(2) | yes | .55501 |
| C(8)  | H(5)  | 2.75(1) | no  | .55501 |
| C(8)  | H(6)  | 2.77(2) | no  | .55501 |
| C(8)  | H(9)  | 2.10(2) | no  | .55501 |
| C(8)  | H(10) | 2.14(2) | no  | .55501 |
| C(8)  | H(11) | 3.07(1) | no  | .55501 |
| C(12) | N(3)  | 2.58(2) | yes | .55501 |
| C(12) | N(4)  | 3.58(1) | yes | .55501 |
| C(12) | C(16) | 2.45(2) | yes | .55501 |
| C(12) | C(10) | 3.56(2) | yes | .55501 |
| C(12) | C(14) | 2.45(2) | yes | .55501 |

|       |       |         |     |        |
|-------|-------|---------|-----|--------|
| C(12) | C(15) | 2.86(2) | yes | .55501 |
| C(12) | H(11) | 2.87(1) | no  | .55501 |
| C(12) | H(14) | 2.01(2) | no  | .55501 |
| C(12) | H(15) | 3.30(2) | no  | .55501 |
| C(3)  | N(1)  | 2.55(1) | yes | .55501 |
| C(3)  | N(2)  | 3.58(2) | yes | .55501 |
| C(3)  | C(1)  | 2.45(2) | yes | .55501 |
| C(3)  | C(5)  | 2.40(2) | yes | .55501 |
| C(3)  | C(6)  | 2.91(2) | yes | .55501 |
| C(3)  | H(2)  | 1.98(2) | no  | .55501 |
| C(3)  | H(3)  | 3.23(2) | no  | .55501 |
| C(3)  | H(5)  | 2.82(1) | no  | .55501 |
| C(5)  | C(1)  | 2.32(2) | yes | .55501 |
| C(5)  | C(2)  | 2.66(2) | yes | .55501 |
| C(5)  | C(3)  | 2.40(2) | yes | .55501 |
| C(5)  | H(1)  | 3.28(2) | no  | .55501 |
| C(5)  | H(2)  | 2.05(2) | no  | .55501 |
| C(5)  | H(4)  | 2.08(2) | no  | .55501 |
| C(13) | C(16) | 2.72(2) | yes | .55501 |
| C(13) | C(11) | 2.40(2) | yes | .55501 |
| C(13) | C(15) | 2.40(2) | yes | .55501 |
| C(13) | H(3)  | 3.57(2) | no  | .56401 |
| C(13) | H(13) | 2.06(2) | no  | .55501 |
| C(13) | H(15) | 2.04(2) | no  | .55501 |
| C(13) | H(16) | 3.27(2) | no  | .55501 |
| C(15) | N(3)  | 3.59(2) | yes | .55501 |
| C(15) | N(4)  | 2.53(2) | yes | .55501 |
| C(15) | C(10) | 3.57(2) | yes | .55501 |
| C(15) | C(11) | 2.43(2) | yes | .55501 |
| C(15) | C(12) | 2.86(2) | yes | .55501 |
| C(15) | C(13) | 2.40(2) | yes | .55501 |
| C(15) | H(12) | 2.85(2) | no  | .55501 |
| C(15) | H(14) | 3.25(2) | no  | .55501 |
| C(15) | H(15) | 2.04(2) | no  | .55501 |
| C(9)  | N(1)  | 3.36(1) | yes | .55501 |
| C(9)  | N(3)  | 2.47(1) | yes | .55501 |
| C(9)  | N(2)  | 3.36(2) | yes | .55501 |
| C(9)  | N(4)  | 2.53(2) | yes | .55501 |
| C(9)  | C(7)  | 2.49(2) | yes | .55501 |
| C(9)  | C(11) | 3.59(2) | yes | .55501 |
| C(9)  | C(8)  | 1.61(2) | yes | .55501 |
| C(9)  | H(5)  | 3.51(2) | no  | .55501 |

|      |       |         |     |         |
|------|-------|---------|-----|---------|
| C(9) | H(6)  | 3.46(2) | no  | . 55501 |
| C(9) | H(7)  | 2.15(2) | no  | . 55501 |
| C(9) | H(8)  | 2.11(2) | no  | . 55501 |
| C(9) | H(11) | 2.72(1) | no  | . 55501 |
| C(9) | H(12) | 2.77(2) | no  | . 55501 |
| C(6) | N(1)  | 3.53(2) | yes | . 55501 |
| C(6) | N(2)  | 2.54(2) | yes | . 55501 |
| C(6) | C(7)  | 3.58(2) | yes | . 55501 |
| C(6) | C(2)  | 2.41(2) | yes | . 55501 |
| C(6) | C(3)  | 2.91(2) | yes | . 55501 |
| C(6) | C(4)  | 2.47(2) | yes | . 55501 |
| C(6) | H(2)  | 3.31(2) | no  | . 55501 |
| C(6) | H(3)  | 2.01(2) | no  | . 55501 |
| C(6) | H(6)  | 2.82(2) | no  | . 55501 |
| C(4) | C(1)  | 2.73(2) | yes | . 55501 |
| C(4) | C(2)  | 2.33(2) | yes | . 55501 |
| C(4) | C(6)  | 2.47(2) | yes | . 55501 |
| C(4) | H(1)  | 2.03(2) | no  | . 55501 |
| C(4) | H(3)  | 2.03(2) | no  | . 55501 |
| C(4) | H(4)  | 3.34(2) | no  | . 55501 |
| H(1) | N(1)  | 2.85(1) | no  | . 55501 |
| H(1) | C(1)  | 3.31(2) | no  | . 55501 |
| H(1) | C(2)  | 2.11(2) | no  | . 55501 |
| H(1) | C(5)  | 3.28(2) | no  | . 55501 |
| H(1) | C(4)  | 2.03(2) | no  | . 55501 |
| H(2) | C(2)  | 3.20(2) | no  | . 55501 |
| H(2) | C(3)  | 1.98(2) | no  | . 55501 |
| H(2) | C(5)  | 2.05(2) | no  | . 55501 |
| H(2) | C(6)  | 3.31(2) | no  | . 55501 |
| H(3) | C(1)  | 3.19(2) | no  | . 55501 |
| H(3) | C(3)  | 3.23(2) | no  | . 55501 |
| H(3) | C(6)  | 2.01(2) | no  | . 55501 |
| H(3) | C(4)  | 2.03(2) | no  | . 55501 |
| H(4) | Cl(2) | 2.86(2) | no  | . 54501 |
| H(4) | N(2)  | 2.85(2) | no  | . 55501 |
| H(4) | C(1)  | 2.09(2) | no  | . 55501 |
| H(4) | C(2)  | 3.27(2) | no  | . 55501 |
| H(4) | C(5)  | 2.08(2) | no  | . 55501 |
| H(4) | C(4)  | 3.34(2) | no  | . 55501 |
| H(5) | Cl(2) | 2.29(1) | no  | . 55501 |
| H(5) | N(2)  | 2.94(2) | no  | . 55501 |
| H(5) | C(1)  | 3.00(2) | no  | . 55501 |

|       |       |          |    |         |
|-------|-------|----------|----|---------|
| H(5)  | C(7)  | 1.96(2)  | no | . 55501 |
| H(5)  | C(2)  | 2.01(2)  | no | . 55501 |
| H(5)  | C(8)  | 2.75(1)  | no | . 55501 |
| H(5)  | C(3)  | 2.82(1)  | no | . 55501 |
| H(5)  | C(9)  | 3.51(2)  | no | . 55501 |
| H(6)  | N(1)  | 2.95(2)  | no | . 55501 |
| H(6)  | C(1)  | 2.01(2)  | no | . 55501 |
| H(6)  | C(7)  | 1.92(2)  | no | . 55501 |
| H(6)  | C(2)  | 3.02(2)  | no | . 55501 |
| H(6)  | C(8)  | 2.77(2)  | no | . 55501 |
| H(6)  | C(9)  | 3.46(2)  | no | . 55501 |
| H(6)  | C(6)  | 2.82(2)  | no | . 55501 |
| H(7)  | Cl(2) | 3.15(1)  | no | . 55501 |
| H(7)  | N(1)  | 2.67(1)  | no | . 55501 |
| H(7)  | N(3)  | 3.30(1)  | no | . 55501 |
| H(7)  | N(2)  | 3.21(2)  | no | . 55501 |
| H(7)  | N(4)  | 3.49(1)  | no | . 55501 |
| H(7)  | C(7)  | 2.06(2)  | no | . 55501 |
| H(7)  | C(10) | 2.66(2)  | no | . 55501 |
| H(7)  | C(9)  | 2.15(2)  | no | . 55501 |
| H(8)  | Cl(1) | 2.781(9) | no | . 55501 |
| H(8)  | N(1)  | 3.24(1)  | no | . 55501 |
| H(8)  | N(3)  | 2.87(1)  | no | . 55501 |
| H(8)  | N(2)  | 2.67(1)  | no | . 55501 |
| H(8)  | C(7)  | 2.06(1)  | no | . 55501 |
| H(8)  | C(10) | 2.71(1)  | no | . 55501 |
| H(8)  | C(9)  | 2.11(2)  | no | . 55501 |
| H(9)  | N(1)  | 3.14(2)  | no | . 55501 |
| H(9)  | N(3)  | 3.21(1)  | no | . 55501 |
| H(9)  | N(4)  | 2.58(1)  | no | . 55501 |
| H(9)  | C(7)  | 2.63(2)  | no | . 55501 |
| H(9)  | C(10) | 2.03(1)  | no | . 55501 |
| H(9)  | C(8)  | 2.10(2)  | no | . 55501 |
| H(10) | N(3)  | 2.75(2)  | no | . 55501 |
| H(10) | N(2)  | 3.21(2)  | no | . 55501 |
| H(10) | N(4)  | 3.15(2)  | no | . 55501 |
| H(10) | C(7)  | 2.69(2)  | no | . 55501 |
| H(10) | C(10) | 2.09(2)  | no | . 55501 |
| H(10) | C(8)  | 2.14(2)  | no | . 55501 |
| H(11) | Cl(1) | 2.354(8) | no | . 55501 |
| H(11) | N(4)  | 3.04(1)  | no | . 55501 |
| H(11) | C(16) | 3.10(1)  | no | . 55501 |

|       |       |         |    |        |
|-------|-------|---------|----|--------|
| H(11) | C(10) | 1.95(1) | no | .55501 |
| H(11) | C(11) | 2.02(1) | no | .55501 |
| H(11) | C(8)  | 3.07(1) | no | .55501 |
| H(11) | C(12) | 2.87(1) | no | .55501 |
| H(11) | C(9)  | 2.72(1) | no | .55501 |
| H(12) | N(3)  | 3.03(1) | no | .55501 |
| H(12) | C(16) | 2.03(1) | no | .55501 |
| H(12) | C(10) | 1.98(1) | no | .55501 |
| H(12) | C(11) | 3.02(1) | no | .55501 |
| H(12) | C(15) | 2.85(2) | no | .55501 |
| H(12) | C(9)  | 2.77(2) | no | .55501 |
| H(13) | N(3)  | 2.86(2) | no | .55501 |
| H(13) | C(16) | 3.31(2) | no | .55501 |
| H(13) | C(11) | 2.12(2) | no | .55501 |
| H(13) | C(14) | 3.31(2) | no | .55501 |
| H(13) | C(13) | 2.06(2) | no | .55501 |
| H(14) | C(11) | 3.27(2) | no | .55501 |
| H(14) | C(14) | 2.02(2) | no | .55501 |
| H(14) | C(12) | 2.01(2) | no | .55501 |
| H(14) | C(15) | 3.25(2) | no | .55501 |
| H(15) | C(16) | 3.23(2) | no | .55501 |
| H(15) | C(12) | 3.30(2) | no | .55501 |
| H(15) | C(5)  | 3.46(2) | no | .56401 |
| H(15) | C(13) | 2.04(2) | no | .55501 |
| H(15) | C(15) | 2.04(2) | no | .55501 |
| H(15) | C(4)  | 3.37(2) | no | .56401 |
| H(16) | Cl(1) | 3.06(1) | no | .46501 |
| H(16) | N(4)  | 2.79(2) | no | .55501 |
| H(16) | C(16) | 2.03(2) | no | .55501 |
| H(16) | C(11) | 3.28(2) | no | .55501 |
| H(16) | C(14) | 2.06(2) | no | .55501 |
| H(16) | C(13) | 3.27(2) | no | .55501 |

#=====

=

# Additional structures and associated data\_? identifiers  
 # should be added at this point if there is more than one  
 # structure analysis in the CIF.

#=====

=

# End of CIF

#=====

=
